# Supplementary material for: An Enhanced Histopathology Analysis: An AI-Based System for Multiclass Grading of Oral Squamous Cell Carcinoma and Segmenting of Epithelial and Stromal Tissue
Source: MDPI journal article supplement (doi:10.3390/cancers13081784), 2021-04-08
Supplement: s1 [file s1]

**Table S1.** Legend of abbreviations and acronyms used in the research.

| <b>Abbreviation / acronyms</b> | <b>Explanation</b>                                |
|--------------------------------|---------------------------------------------------|
| OC                             | Oral Cancer                                       |
| OSCC                           | Oral Squamous Cell Carcinoma                      |
| TNM                            | Tumor-Node-Metastasis                             |
| COE                            | Conventional Oral Examination                     |
| AI                             | Artificial Intelligence                           |
| CNN                            | Convolutional Neural Network                      |
| SVM                            | Support-Vector Machine                            |
| DAG                            | Directed Acyclic Graph                            |
| SWT                            | Stationary Wavelet Transform                      |
| HSI                            | Hyperspectral Imaging                             |
| MRI                            | Magnetic Resonance Imaging                        |
| MeMoSA                         | Mobile Mouth Screening Anywhere                   |
| ROI                            | Region of Interest                                |
| H&E                            | Hamatoxylin and Eosin                             |
| WSI                            | Whole Slide Image                                 |
| WHO                            | World Health Organization                         |
| AJCC                           | American Joint Committee on Cancer                |
| MT                             | Metallothionein                                   |
| PBS                            | Phosphate-Buffered Saline                         |
| BSA                            | Bovine Serum Albumin                              |
| DAB                            | Diaminobenzidine                                  |
| WT                             | Wavelet Transform                                 |
| DWT                            | Discrete Wavelet Transform                        |
| L_D                            | Low pass filter                                   |
| H_D                            | High pass filter                                  |
| LL                             | Approximation coefficients                        |
| LH                             | Horizontal coefficients                           |
| HL                             | Vertical coefficients                             |
| HH                             | Diagonal coefficients                             |
| CM                             | Coefficient Mapping function                      |
| ILSVRC                         | ImageNet Large Scale Visual Recognition Challenge |
| ASPP                           | Atrous Spatial Pyramid Pooling                    |
| AUC                            | Area Under the Curve                              |
| mIOU                           | Mean Intersection-Over-Union                      |
| F1                             | Dice Coefficient                                  |
| ACC                            | Accuracy                                          |
| TPR                            | True Positive Rate                                |
| FPR                            | False Positive Rate                               |
| TP                             | True Positive                                     |
| TN                             | True Negative                                     |
| FN                             | False Negative                                    |
| FP                             | False Positive                                    |
| SGD                            | Stochastic Gradient Descent                       |

HPC  
TSR  
TILs

High Performance Computing  
Tumor-Stroma Ratio  
Tumor-Infiltrating Lymphocytes

---
